# Supplementary material for: Exploiting butyrylcholinesterase inhibitors through a combined 3-D pharmacophore modeling, QSAR, molecular docking, and molecular dynamics investigation
Source: Royal Society of Chemistry journal article supplement (doi:10.1039/d3ra00526g), 2023-01-01
Supplement: d3ra00526g1.pdf [file d3ra00526g1.pdf]

**Exploiting Butyrylcholinesterase inhibitors through a combined 3-D pharmacophore modeling, QSAR, molecular docking, and molecular dynamics investigation**

Sunil Kumar<sup>a</sup>, Amritha Manoharan<sup>a</sup>, Jayalakshmi J<sup>a</sup>, Mohamed A. Abdelgawad<sup>b,c</sup>, Wael A. Mahdi<sup>d</sup>, Sultan Alshehri<sup>d</sup>, Mohammed M. Ghoneim<sup>e,f</sup>, Leena K Pappachen<sup>a</sup>, Subin Mary Zachariah<sup>a</sup>, T.P. Aneesh<sup>g\*</sup>, Bijo Mathew<sup>a\*</sup>

<sup>a</sup> Department of Pharmaceutical Chemistry, Amrita School of Pharmacy, Amrita Vishwa Vidyapeetham, AIMS Health Sciences Campus, Kochi 682 041, India.

<sup>b</sup> Department of pharmaceutical chemistry, College of pharmacy, Jouf university, Sakaka 72341, Saudi Arabia.

<sup>c</sup> Department of Pharmaceutical Organic Chemistry, Faculty of Pharmacy, Beni-Suef University, Beni-Suef, Egypt

<sup>d</sup> Department of Pharmaceutics, College of departmenting Saud University, Riyadh 11451, Saudi Arabia.

<sup>e</sup> Department of Pharmacy Practice, College of Pharmacy, AlMaarefa University, Ad Diriyah 13713, Saudi Arabia.

<sup>f</sup> Pharmacognosy and Medicinal Plants Department, Faculty of Pharmacy, Al-Azhar University, Cairo 11884, Egypt

\*Corresponding Authors:

Bijo Mathew (B. Mathew) ([bijomathew@aims.amrita.edu](mailto:bijomathew@aims.amrita.edu)) ([bijovilaventgu@gmail.com](mailto:bijovilaventgu@gmail.com))

T. P. Aneesh ([aneeshtp@aims.amrita.edu](mailto:aneeshtp@aims.amrita.edu))



**Table S1.** BuChE for QSAR predicted and Actual activity

| Ligand Name                                                                                      | QSAR Set | Actual Activity (pIC <sub>50</sub> ) | Field-based QSAR for Predicted Activity (PLS 5) | QSAR Set | Atom based QSAR for Predicted Activity (PLS 3) |
|--------------------------------------------------------------------------------------------------|----------|--------------------------------------|-------------------------------------------------|----------|------------------------------------------------|
| 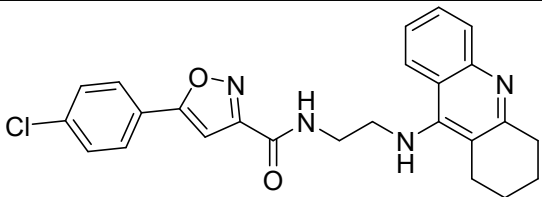<br>Compound 1  | training | 7.409                                | 7.01747                                         | training | 7.1583                                         |
| <br>Compound 2 | training | 7.328                                | 6.92972                                         | training | 7.13788                                        |

|                                                                                                      |          |       |         |          |         |
|------------------------------------------------------------------------------------------------------|----------|-------|---------|----------|---------|
| 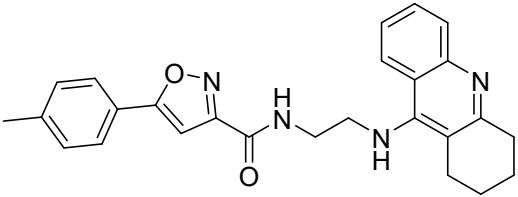 <p>Compound 3</p>  | Test     | 7.292 | 6.95671 | training | 7.16023 |
|  <p>Compound 4</p>  | training | 7.125 | 6.80468 | training | 7.09444 |
|  <p>Compound 5</p> | training | 7.06  | 7.03326 | test     | 7.16062 |
|                   | training | 7.056 | 6.91335 | training | 7.10718 |

| Compound 6                                                                                                                         |          |       |         |          |         |
|------------------------------------------------------------------------------------------------------------------------------------|----------|-------|---------|----------|---------|
| 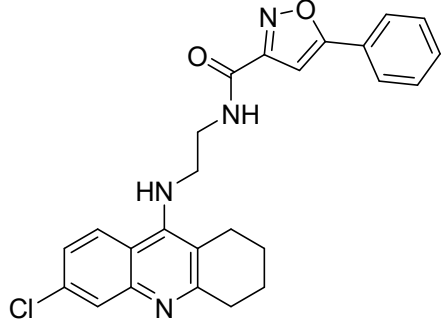 <p data-bbox="449 639 617 672">Compound 7</p>    | training | 7.056 | 6.86385 | training | 7.05836 |
|  <p data-bbox="449 1083 617 1115">Compound 8</p> | Test     | 6.983 | 6.90626 | test     | 7.11863 |

|                                                                                                      |          |       |         |          |         |
|------------------------------------------------------------------------------------------------------|----------|-------|---------|----------|---------|
| 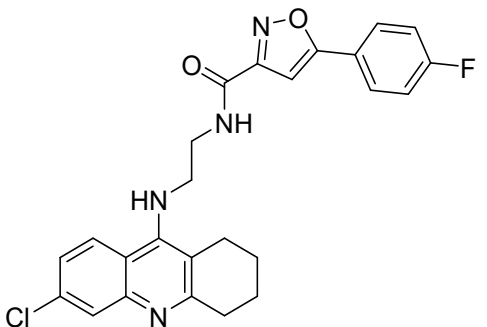 <p>Compound 9</p>  | training | 6.695 | 6.88183 | training | 7.08906 |
|  <p>Compound 10</p> | Test     | 6.429 | 6.96956 | training | 7.10948 |

|                                                                                                        |          |       |         |          |         |
|--------------------------------------------------------------------------------------------------------|----------|-------|---------|----------|---------|
| 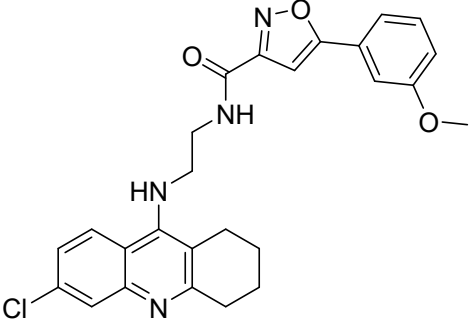 <p>Compound 11</p>   | training | 6.384 | 6.7491  | test     | 7.04661 |
|  <p>Compound 12</p>   | training | 6.26  | 5.08415 | training | 4.96704 |
|  <p>Compound 13</p>  | training | 6.145 | 5.63036 | training | 5.37106 |
|  <p>Compound 14</p> | training | 6.086 | 5.06577 | test     | 4.9599  |

|                                                                                                        |          |       |         |          |         |
|--------------------------------------------------------------------------------------------------------|----------|-------|---------|----------|---------|
| 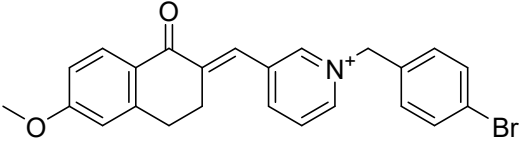 <p>Compound 15</p>   | Test     | 6.054 | 5.49175 | training | 5.39839 |
|  <p>Compound 16</p>   | training | 6.004 | 5.13524 | training | 4.96745 |
|  <p>Compound 17</p>   | training | 5.973 | 6.8144  | test     | 7.09513 |
|  <p>Compound 18</p> | Test     | 5.539 | 5.04063 | training | 4.96209 |



|                                                                                                        |          |       |         |          |         |
|--------------------------------------------------------------------------------------------------------|----------|-------|---------|----------|---------|
| 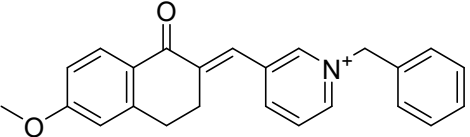 <p>Compound 19</p>   | training | 5.531 | 5.08863 | training | 4.9037  |
|  <p>Compound 20</p>   | training | 5.321 | 4.72085 | training | 4.66346 |
|  <p>Compound 21</p>  | Test     | 5.297 | 5.02728 | training | 4.95009 |
|  <p>Compound 22</p> | training | 5.247 | 5.57774 | test     | 5.35398 |

|                                                                                                        |          |       |         |          |         |
|--------------------------------------------------------------------------------------------------------|----------|-------|---------|----------|---------|
| 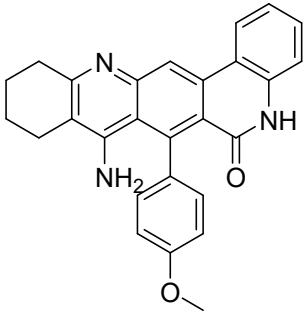 <p>Compound 23</p>   | Test     | 5.246 | 4.16236 | training | 4.38751 |
|  <p>Compound 24</p>   | training | 5.202 | 5.50657 | test     | 5.39353 |
|  <p>Compound 25</p>  | training | 4.977 | 5.14092 | training | 4.96781 |
|  <p>Compound 26</p> | training | 4.928 | 5.5032  | training | 5.39352 |

|                                                                                                        |          |       |         |          |         |
|--------------------------------------------------------------------------------------------------------|----------|-------|---------|----------|---------|
| 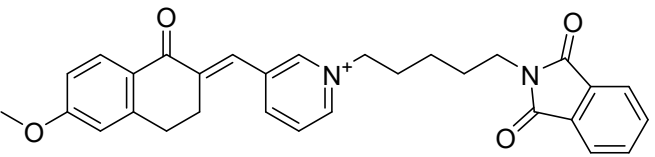 <p>Compound 27</p>   | training | 4.893 | 4.78543 | training | 4.96557 |
|  <p>Compound 28</p>   | Test     | 4.89  | 5.09527 | test     | 4.94496 |
|  <p>Compound 29</p>   | training | 4.862 | 4.52889 | training | 4.56369 |
|  <p>Compound 30</p> | training | 4.855 | 5.04828 | training | 4.94011 |

|                                                                                                        |          |       |         |          |         |
|--------------------------------------------------------------------------------------------------------|----------|-------|---------|----------|---------|
| 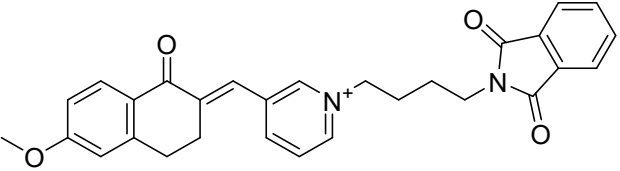 <p>Compound 31</p>   | Test     | 4.799 | 4.75247 | test     | 4.95427 |
|  <p>Compound 32</p>   | training | 4.795 | 4.96831 | training | 4.90528 |
|  <p>Compound 33</p>   | Test     | 4.761 | 5.07329 | training | 4.96823 |
|  <p>Compound 34</p> | training | 4.735 | 4.52077 | training | 4.9408  |

|                                                                                                      |          |       |         |          |         |
|------------------------------------------------------------------------------------------------------|----------|-------|---------|----------|---------|
| 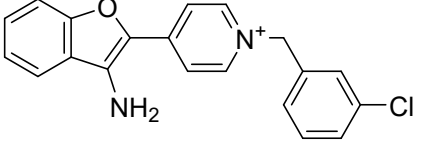 <p>Compound 35</p> | training | 4.727 | 5.05447 | test     | 4.94493 |
|  <p>Compound 36</p> | training | 4.694 | 4.51215 | training | 4.55197 |
|  <p>Compound 37</p> | Test     | 4.686 | 5.06602 | test     | 4.88908 |
|                   | training | 4.661 | 4.50473 | training | 4.53675 |

|                                                                                    |          |       |         |          |         |
|------------------------------------------------------------------------------------|----------|-------|---------|----------|---------|
| Compound 38                                                                        |          |       |         |          |         |
| 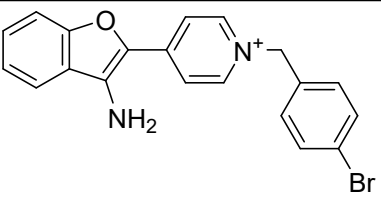  | training | 4.647 | 5.02471 | training | 4.93686 |
| Compound 39                                                                        |          |       |         |          |         |
|   | training | 4.596 | 5.04273 | training | 4.94246 |
| Compound 40                                                                        |          |       |         |          |         |
|  | training | 4.581 | 4.54142 | training | 4.56224 |
| Compound 41                                                                        |          |       |         |          |         |

|                                                                                                       |          |       |         |          |         |
|-------------------------------------------------------------------------------------------------------|----------|-------|---------|----------|---------|
| 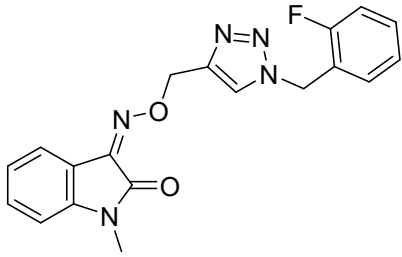 <p>Compound 42</p>  | Test     | 4.567 | 4.52572 | training | 4.5539  |
|  <p>Compound 43</p>  | Test     | 4.56  | 4.61829 | test     | 4.61094 |
|  <p>Compound 44</p> | training | 4.549 | 4.92555 | test     | 4.95284 |

|                                                                                                       |          |       |         |          |         |
|-------------------------------------------------------------------------------------------------------|----------|-------|---------|----------|---------|
| 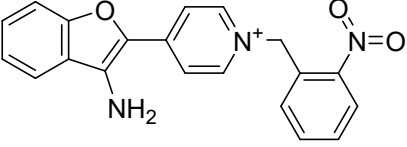 <p>Compound 45</p>  | training | 4.543 | 4.91151 | training | 4.8981  |
|  <p>Compound 46</p>  | training | 4.506 | 5.03493 | training | 4.9398  |
|  <p>Compound 47</p> | training | 4.403 | 4.44188 | training | 4.54792 |



|                                                                                                       |          |       |         |          |         |
|-------------------------------------------------------------------------------------------------------|----------|-------|---------|----------|---------|
| 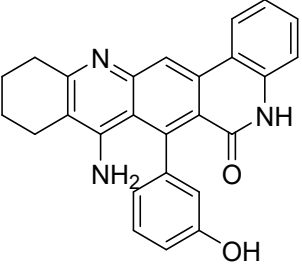 <p>Compound 48</p>  | Test     | 4.378 | 4.19165 | training | 4.37168 |
|  <p>Compound 49</p>  | training | 4.244 | 4.13395 | training | 4.3722  |
|  <p>Compound 50</p> | Test     | 4.208 | 4.53433 | test     | 4.53704 |

|                                                                                                       |          |   |         |          |         |
|-------------------------------------------------------------------------------------------------------|----------|---|---------|----------|---------|
| 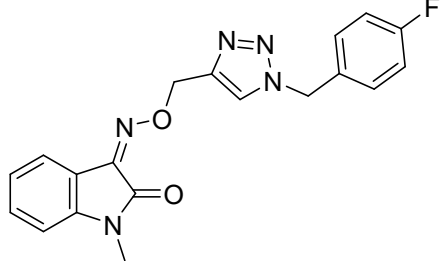 <p>Compound 51</p>  | training | 4 | 4.4863  | test     | 4.54588 |
|  <p>Compound 52</p>  | Test     | 4 | 4.48513 | training | 4.5214  |
|  <p>Compound 53</p> | training | 4 | 4.4672  | training | 4.51285 |

|                                                                                                        |          |   |         |          |         |
|--------------------------------------------------------------------------------------------------------|----------|---|---------|----------|---------|
| 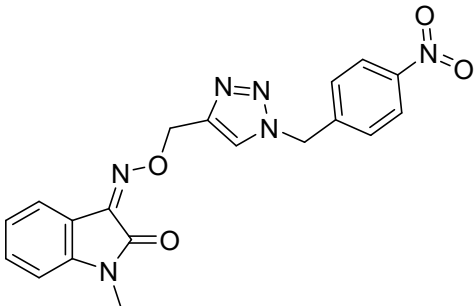 <p>Compound 54</p>   | training | 4 | 4.42237 | test     | 4.55175 |
|  <p>Compound 55</p>   | training | 4 | 4.4656  | training | 4.51797 |
|  <p>Compound 56</p> | Test     | 4 | 4.96642 | training | 4.88115 |

|                                                                                                       |          |   |         |          |         |
|-------------------------------------------------------------------------------------------------------|----------|---|---------|----------|---------|
| 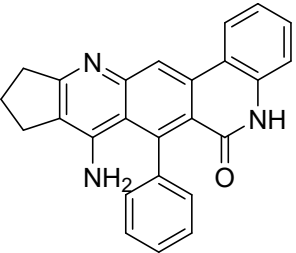 <p>Compound 57</p>  | Test     | 4 | 3.79702 | training | 4.0359  |
|  <p>Compound 58</p>  | training | 4 | 3.78282 | test     | 4.04397 |
|  <p>Compound 59</p> | training | 4 | 3.78324 | test     | 4.04822 |

|                                                                                                        |          |   |         |          |         |
|--------------------------------------------------------------------------------------------------------|----------|---|---------|----------|---------|
| 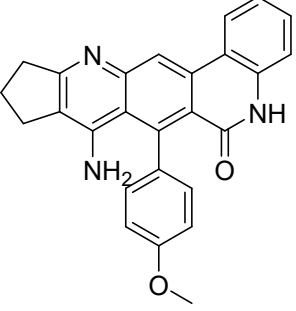 <p>Compound 60</p>   | Test     | 4 | 3.83309 | training | 4.02512 |
|  <p>Compound 61</p>   | training | 4 | 3.83536 | training | 4.02444 |
|  <p>Compound 62</p> | training | 4 | 3.82083 | training | 4.04059 |

|                    |          |   |         |          |         |
|--------------------|----------|---|---------|----------|---------|
| <p>Compound 63</p> | training | 4 | 3.78918 | training | 4.02303 |
| <p>Compound 64</p> | training | 4 | 4.17606 | training | 4.38877 |
| <p>Compound 65</p> | training | 4 | 4.15722 | test     | 4.3764  |

|                                                                                                        |          |   |         |          |         |
|--------------------------------------------------------------------------------------------------------|----------|---|---------|----------|---------|
| 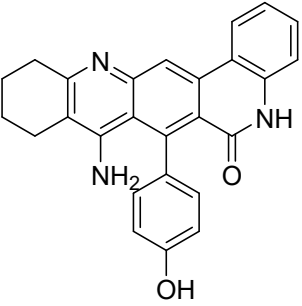 <p>Compound 66</p>   | Test     | 4 | 4.18808 | test     | 4.38807 |
|  <p>Compound 67</p>   | training | 4 | 4.15993 | training | 4.31344 |
|  <p>Compound 68</p> | training | 4 | 4.29067 | training | 4.78356 |

**Table S2.** Hit compounds with the associated smiles and docking scores.

| Title        | Smiles                                                                    | Docking score (XP mode) | Predicted activity 5 by Field based QSAR (pIC <sub>50</sub> ) | Estimate by 3D Pharmacophore Modeling (nM) | Fit Value for 3D pharmacophore model |
|--------------|---------------------------------------------------------------------------|-------------------------|---------------------------------------------------------------|--------------------------------------------|--------------------------------------|
| Molecule5093 | <chem>Cc1ccc(C)c(N2)c1C=C(CNCc(cc1)ccc1Cl)C2=O</chem>                     | -9.9396                 | 4.779075529                                                   | 484.354                                    | 6.32114                              |
| Molecule1076 | <chem>Cc1ccc(CNCC2=Cc(c(C)ccc3C)c3NC2=O)cc1</chem>                        | -9.85266                | 5.031473031                                                   | 483.841                                    | 6.3216                               |
| Molecule4412 | <chem>Cc1ccc(C)c(N2)c1C=C(CNCc(cc1)cc3c1OCO3)C2=O</chem>                  | -9.72215                | 4.703024498                                                   | 463.151                                    | 6.34058                              |
| Molecule1053 | <chem>Cc1ccc(C)c(N2)c1C=C(CNCc1cc(OC)c cc1)C2=O</chem>                    | -9.57104                | 4.888115675                                                   | 485.046                                    | 6.32052                              |
| Molecule3344 | <chem>Cc1ccc(C)c(N2)c1C=C(CNCc(cc1)ccc1OC)C2=O</chem>                     | -9.07798                | 4.918060849                                                   | 492.702                                    | 6.31372                              |
| Molecule1695 | <chem>Cc1ccc(C)c(N2)c1C=C(CNCc1cccc(F)c1)C2=O</chem>                      | -8.8853                 | 4.716451827                                                   | 483.084                                    | 6.32228                              |
| Molecule4651 | <chem>OC1(CCN(Cc2c(C(F)(F)F)[nH]c3c2ccc n3)CC1)c(ccc1)c1F</chem>          | -8.84899                | 4.749806312                                                   | 1001.64                                    | 6.00559                              |
| Molecule3440 | <chem>Cc1ccc([C@H](c2cnccc2)NCc(cc2OC) cc3c2OCCO3)cc1</chem>              | -8.83569                | 5.065871666                                                   | 864.521                                    | 6.06952                              |
| Molecule4313 | <chem>CCC(N[C@H](CN(Cc1cccc1)C1)[C@ @H]1c1c(C2CC2)[nH]c2c1cccn2)=O</chem> | -8.67985                | 4.544218884                                                   | 415.368                                    | 6.38787                              |
| Molecule1723 | <chem>Cc1ccc(CNCC2=Cc(cc(C)cc3C)c3NC2=O)cc1</chem>                        | -8.51909                | 4.86938829                                                    | 943.076                                    | 6.03175                              |
| Molecule4046 | <chem>CC(C)c([nH]1)c(CN(CC2)CCC2(c2ccc cc2)NC(C)=O)c2c1ncc(C)c2</chem>    | -8.38236                | 5.20825585                                                    | 970.178                                    | 6.01945                              |
| Molecule5921 | <chem>Cc1cccc(C=C2CN(C3CCCC3)C(c3cccs 3)=O)c1NC2=O</chem>                 | -8.26656                | 4.693281721                                                   | 270.079                                    | 6.57481                              |
| Molecule4676 | <chem>CCCOc(c(CN(CCC1)C[C@H]1c([nH]1 )cc2c1nccc2)ccc1)c1OC</chem>         | -8.15113                | 4.705824876                                                   | 528.527                                    | 6.28323                              |



|              |                                                                                  |          |             |         |         |
|--------------|----------------------------------------------------------------------------------|----------|-------------|---------|---------|
| Molecule6046 | <chem>CC1(C)OCC[C@](CCNCc(cc2)cc3c2O<br/>CO3)(Cc2ccccc2)C1</chem>                | -8.13833 | 4.748465488 | 489.826 | 6.31626 |
| Molecule2163 | <chem>C[C@@H](c1nc(N2CCC(C)CC2)nc(O)<br/>c1)NCc(cc1)cc(N2C)c1N(C)C2=O</chem>     | -8.12944 | 4.571676446 | 965.18  | 6.02169 |
| Molecule5712 | <chem>COc(cc1)c([C@H](CN(CCC2)[C@H]2<br/>c(cc2)cc(OC)c2OC)O)cc1F</chem>          | -8.04025 | 4.752099537 | 332.473 | 6.48454 |
| Molecule4717 | <chem>CC(C)n1nc(C)c(CN(CCC2)C[C@H]2c<br/>2cc3ccnc3[nH]2)c1C</chem>               | -7.8545  | 5.030468784 | 793.148 | 6.10695 |
| Molecule5470 | <chem>Cc(cc1C)cc(C=C2CNc(cc3)cc4c3OC<br/>O4)c1NC2=O</chem>                       | -7.76977 | 4.700456031 | 945.072 | 6.03084 |
| Molecule4043 | <chem>Cc1cc([C@@H](CN(CC2)CCC2(c2cc(<br/>C(F)(F)F)ccc2)O)O)c(C)s1</chem>         | -7.71816 | 4.894167236 | 637.958 | 6.20151 |
| Molecule3841 | <chem>Cc1ccc([C@@H]([C@@H](CCC2)NC<br/>c3cc(OC)ccc3)N2C(C2CC2)=O)s1</chem>       | -7.68353 | 4.608620101 | 408.293 | 6.39533 |
| Molecule3943 | <chem>CN(CC1)CCN1c1cc(CCNS(c(ccc2)c2<br/>OC)(=O)=O)nc(C2CC2)n1</chem>            | -7.63122 | 4.32593379  | 332.581 | 6.4844  |
| Molecule2553 | <chem>CNc1c(CN(C)CC2)c2nc([C@@H](CC<br/>C2)CN2C(CCc2c[nH]c3c2ccccc3)=O)n1</chem> | -7.56795 | 4.583408926 | 140.624 | 6.85824 |
| Molecule2825 | <chem>Cc1nc(CC(N(CC2)CCC2(Nc2c3ccccc2)<br/>NC3=O)=O)c(-c2ccccc2)s1</chem>        | -7.50992 | 4.612387659 | 217.51  | 6.66882 |
| Molecule6047 | <chem>CC(C)(C1)OCC[C@H]1[C@@H](CCN<br/>Cc(cc1)cc2c1OCO2)c1ccc(C)cc1</chem>       | -7.4206  | 5.049996878 | 466.418 | 6.33752 |
| Molecule3264 | <chem>CN(C)Cc1cc([C@H](CCC2)N2C(CCC<br/>c2c[nH]c3c2ccccc3)=O)nn1C</chem>         | -7.3493  | 4.894776192 | 356.861 | 6.4538  |
| Molecule5679 | <chem>Cc1nn(CC=C)cc1CN(CCC1)CC[C@]1(<br/>c(cc1)ccc1F)O</chem>                    | -7.33668 | 5.283088576 | 329.256 | 6.48877 |
| Molecule5409 | <chem>COC(Cn1c(ccc2)c2c(CN(CC2)CCC2(c<br/>(cc2)ccc2F)O)c1)=O</chem>              | -7.27092 | 5.208353134 | 914.499 | 6.04512 |
| Molecule3976 | <chem>CN(CC1)CCN1c1cc(CCNS(c(cc2)ccc2<br/>OC)(=O)=O)nc(C2CC2)n1</chem>           | -7.24062 | 4.487505846 | 609.71  | 6.22118 |
| Molecule4415 | <chem>Cc1nc(O)cc([C@H]2CN(Cc(cc(CCCC3<br/>)c3c3)c3OC)CC2)n1</chem>               | -7.16979 | 4.947756836 | 973.244 | 6.01808 |
| Molecule4407 | <chem>Cc(c(C)c1)cc2c1OC1(CCN(C[C@H](c(<br/>C1)O)C)C)C1</chem>                    | -7.11615 | 4.724985896 | 108.023 | 6.97278 |

|              |                                                                         |          |             |         |         |
|--------------|-------------------------------------------------------------------------|----------|-------------|---------|---------|
|              | <chem>cc3)cc4c3OCCO4)O)CC1)C=C2</chem>                                  |          |             |         |         |
| Molecule4454 | <chem>COc(ccc([C@H](C1)c(ccc2ccccc22)c2NC1=O)c1)c1OC</chem>             | -7.11384 | 4.629830094 | 395.572 | 6.40907 |
| Molecule1623 | <chem>Cc1ccc(C)c(N2)c1C=C(CNc1ccccc1)C2=O</chem>                        | -7.03559 | 4.737497223 | 682.246 | 6.17236 |
| Molecule4227 | <chem>Cc1ccc(C2(CCN(Cc(c(C)c3)cc(OC)c3OC)CC2)O)cc1</chem>               | -6.9741  | 4.818348073 | 362.272 | 6.44727 |
| Molecule5570 | <chem>CCOc(cc(CN(CC1)CCC1c([nH]1)cc2c1nccc2)c(C)c1)c1OC</chem>          | -6.9619  | 4.613083754 | 910.706 | 6.04692 |
| Molecule5077 | <chem>Cc1ccc(C)c(N2)c1C=C(CNCc(cccc1)c1Cl)C2=O</chem>                   | -6.91658 | 4.769590782 | 483.04  | 6.32232 |
| Molecule2903 | <chem>CCc1noc(C)c1C(N(C[C@H]1c2cccc(F)c2)[C@H]2[C@H]1NCCCCC2)=O</chem>  | -6.91614 | 5.137455039 | 588.439 | 6.2366  |
| Molecule853  | <chem>COc(cc1)c(C=C(CNc2ccccc2)C(N2)=O)c2c1OC</chem>                    | -6.89497 | 4.737307427 | 507.673 | 6.30072 |
| Molecule5898 | <chem>Cc1nn2c(N)cc([C@@H]3CN(Cc(cc(cc4)OC)c4OC)CCC3)nc2c1</chem>        | -6.81438 | 4.757576926 | 96.9679 | 7.01967 |
| Molecule5415 | <chem>C[C@@H](CCN(CCC1)C[C@H]1c1nc2cc(C)nn2c(N)c1)c1ccc(C)o1</chem>     | -6.62465 | 4.726507908 | 670.846 | 6.17968 |
| Molecule4534 | <chem>Cc1noc(C)c1S(NCCc1nc(C2CC2)nc(N2CCN(C)CC2)c1)(=O)=O</chem>        | -6.61864 | 4.329782793 | 501.09  | 6.30638 |
| Molecule4990 | <chem>Cc(cc1)cc(CN([C@H](CC2)C3)[C@@H]2C[C@]3(c2cccc(F)c2)O)c1OC</chem> | -6.61405 | 4.983256889 | 743.704 | 6.1349  |
| Molecule2254 | <chem>Cc1enc(CCNS(c2cc([C@H](CC3)NC(C4CCCC4)=O)c3cc2)(=O)=O)s1</chem>   | -6.60758 | 4.609783239 | 149.195 | 6.83255 |
| Molecule4446 | <chem>Cc1c(CN(CC2)CCC2(c(Enc(OC)n2)c2OC)O)c(cccc2)c2o1</chem>           | -6.44109 | 4.425278461 | 310.776 | 6.51385 |
| Molecule5403 | <chem>COc1ccc(C2(CCCC2)NCc2c[nH]c3c2ccc(OC)c3)cc1</chem>                | -6.39607 | 4.927540192 | 375.268 | 6.43196 |
| Molecule5703 | <chem>Cc1nn2c(N)cc([C@@H]3CN(Cc(cccc4)c4OCC=C)CCC3)nc2c1</chem>         | -6.37246 | 4.611953029 | 234.88  | 6.63545 |
| Molecule4930 | <chem>Cc1c(C)sc([C@@H](Cc2csc2)NC(c2n[nH]cc2)=O)n1</chem>               | -6.36825 | 4.54137217  | 857.82  | 6.0729  |

|              |                                                                               |          |             |         |         |
|--------------|-------------------------------------------------------------------------------|----------|-------------|---------|---------|
| Molecule5390 | <chem>CC(C)(C)c1csc(CCNC(c2c3nc(C4CC4)cc(C(F)F)n3nc2)=O)n1</chem>             | -6.24483 | 4.531604094 | 556.932 | 6.2605  |
| Molecule316  | <chem>Cc1nn(CC=C)cc1CN(CC1)CCC1(c1c(C)cccc1)O</chem>                          | -6.1694  | 4.787468789 | 612.985 | 6.21885 |
| Molecule3792 | <chem>Cc1ccc([C@@H]([C@@H](CCC2)NCc3cccc3)N2C(C2CC2)=O)s1</chem>              | -6.01437 | 4.54331046  | 643.445 | 6.19779 |
| Molecule1436 | <chem>CCOc(ccc(CNCc1cccc1)c1)c1OCC</chem>                                     | -6.0086  | 4.79675048  | 372.339 | 6.43536 |
| Molecule5037 | <chem>Cc1nn(CC=C)cc1CN([C@H](CC1)C2)[C@@H]1C[C@@]2(c1cccc(F)c1)O</chem>       | -5.83013 | 5.198136557 | 529.136 | 6.28273 |
| Molecule3749 | <chem>C[C@@H](Cc(cc1)cc2c1OCO2)CN(Cc1nc2cc(-c3noc(C)c3)nn2)Cc1c2O</chem>      | -5.77804 | 4.925416841 | 309.642 | 6.51544 |
| Molecule4435 | <chem>Cc(c(CN([C@H](CC1)C2)[C@@H]1C[C@@]2(c(cc1)ccc1OC)O)c1)cc(OC)c1OC</chem> | -5.66664 | 4.827255188 | 454.746 | 6.34853 |
| Molecule2699 | <chem>Cc(c(C)c1)cc2c1OC1(CCN(CC(c(cc3)cc3)NC(C3CC3)=O)O)CC1)C=C2</chem>       | -5.64837 | 5.103055779 | 66.6952 | 7.18221 |
| Molecule5182 | <chem>Cc1cc(CN(CCCc2nc(-c3ccncc3)n3)Cc2c3O)c(C)s1</chem>                      | -5.62624 | 4.663043631 | 932.383 | 6.03671 |
| Molecule223  | <chem>CCOc(ccc(CNCc1cccc1)c1)c1OC</chem>                                      | -5.60263 | 4.874840205 | 609.791 | 6.22112 |
| Molecule5589 | <chem>COc1cc(OC)c(CN(CC2)CCc3c2c(O)nc(N2CCCC2)n3)cc1</chem>                   | -5.52662 | 4.750573521 | 329.59  | 6.48833 |
| Molecule5752 | <chem>COc(ccc([C@@H]([C@H]1[C@H]2CC1)[C@H]2NCc1ncccc1)c1)c1OC</chem>          | -5.40279 | 4.92627287  | 942.07  | 6.03222 |
| Molecule4400 | <chem>CC(C)Oc(ccc(CN([C@H](CC1)C2)[C@@H]1C[C@@]2(c(cc1)ccc1F)O)c1)c1OC</chem> | -5.30529 | 5.038125981 | 816.756 | 6.09421 |
| Molecule434  | <chem>CCOc(ccc(CNCc1cccc1)c1)c1OCC</chem>                                     | -5.2572  | 4.831791571 | 95.3676 | 7.0269  |
| Molecule2913 | <chem>CCOc(cc(CNCc1ncccc1)cc1)c1OC</chem>                                     | -5.1791  | 4.834743702 | 91.2055 | 7.04628 |
| Molecule4635 | <chem>COc(cc1)cc(CN2CCc3nc(N4CCOCC4)nc(O)c3CC2)c1OC</chem>                    | -5.14847 | 5.011585408 | 342.832 | 6.47122 |
| Molecule2688 | <chem>Cc1ccc([C@@H]([C@@H](CCC2)NCc(ccc(OC)c3)c3OC)N2C(C2CC2)=O)s1</chem>     | -5.09101 | 4.945599123 | 792.002 | 6.10757 |
| Molecule4487 | <chem>CC(COc1cc(CN([C@H](CC2)C3)[C@</chem>                                    | -5.01601 | 4.730340726 | 704.08  | 6.15868 |

|              |                                                                                            |          |             |         |         |
|--------------|--------------------------------------------------------------------------------------------|----------|-------------|---------|---------|
|              | <chem>@H]2C[C@]3(c2nccn2C)O)ccc1)=C</chem>                                                 |          |             |         |         |
| Molecule82   | <chem>CCc(cc(cc1)S(Nc2cnccc2)(=O)=O)c1O</chem><br><chem>CC</chem>                          | -4.95451 | 4.610287339 | 721.283 | 6.14819 |
| Molecule5636 | <chem>CCc(cccc1)c1NC(N[C@H]1C[C@H](C</chem><br><chem>CC2)N(Cc3cccs3)[C@H]2C1)=O</chem>     | -4.94066 | 4.518330864 | 507.812 | 6.3006  |
| Molecule5152 | <chem>Cc1cc(CN(CC2)Cc3c2nc(-</chem><br><chem>c2ncccc2)nc3O)cc(C)c1O</chem>                 | -4.93352 | 5.210810478 | 723.383 | 6.14693 |
| Molecule5134 | <chem>Cc(cc1)cc(CN([C@H](CC2)C3)[C@@</chem><br><chem>H]2C[C@]3(c(cccc2)c2F)O)c1OC</chem>   | -4.93034 | 5.053211128 | 835.102 | 6.08456 |
| Molecule2712 | <chem>Cc1ccc([C@@H]([C@@H](CCC2)NC</chem><br><chem>c(c(OC)ccc3)c3OC)N2C(C2CC2)=O)s1</chem> | -4.56306 | 4.788040287 | 196.749 | 6.71239 |
| Molecule4424 | <chem>Cc1nn2c(O)c(CCN(Cc3cn(CC=C)nc3C)</chem><br><chem>CC3)c3nc2c1</chem>                  | -4.46739 | 5.127688103 | 393.691 | 6.41114 |
| Molecule1150 | <chem>CN(c(ccc(CNCc1ccc1)c1)c1N1C)C1=</chem><br><chem>O</chem>                             | -4.41713 | 4.763926812 | 460.353 | 6.34321 |
| Molecule3654 | <chem>CCCOc(c(C)c1)cc(C)c1S(Nc1cnccc1)(=</chem><br><chem>O)=O</chem>                       | -3.9087  | 4.841660235 | 1000.87 | 6.00592 |
| Molecule2099 | <chem>Cc1cccc(C)c1OCC(N1Cc2c(NC)nc([C</chem><br><chem>@@H]3CN(C)CCC3)nc2CC1)=O</chem>      | -3.52271 | 4.269645322 | 607.706 | 6.22261 |
| Molecule3838 | <chem>Cc1ccc([C@@H]([C@@H](CCC2)NC</chem><br><chem>c(cc3)ccc3OC)N2C(C2CC2)=O)s1</chem>     | -3.44294 | 4.567924802 | 99.569  | 7.00818 |
| Molecule4058 | <chem>CC(C)Oc(cc(CN1[C@H]2Cc3nc4cc(C)</chem><br><chem>nn4c(O)c3C[C@@H]1CC2)cc1)c1OC</chem> | -2.83909 | 4.718920826 | 925.558 | 6.0399  |
| Molecule2091 | <chem>CC(C)n1nc(C)c(CN2C[C@H](c3c(C(N</chem><br><chem>C)=O)sc4ncccc34)OCC2)c1C</chem>      | -1.941   | 4.988493157 | 453.31  | 6.3499  |
| Molecule5943 | <chem>CCc(cccc1)c1NC(NC1C[C@H](CCC2)</chem><br><chem>N(Cc3ccccc3)[C@@H]2C1)=O</chem>       | -1.86596 | 4.878245943 | 754.657 | 6.12855 |
| Tacrine      |                                                                                            | -6.215   |             |         |         |

Training: 48

Prediction: 20

Variables: 740

Excluded: 0

Missing: 0

Unknown: 0

Table S3: Correlation matrix for QSARINS model\_1\_best scored.

QI View correlation matrix

|                  | RDF15Se | SpMax2_TheMAXDP2 | ETA_Beta_m | ETA_Extap_B | bcutp13 |
|------------------|---------|------------------|------------|-------------|---------|
| RDF15Se          | 1.0000  |                  |            |             |         |
| SpMax2_TheMAXDP2 | 0.1940  | 1.0000           |            |             |         |
| MAXDP2           | 0.3653  | 0.1820           | 1.0000     |             |         |
| ETA_Beta_m       | 0.2155  | 0.2326           | 0.3429     | 1.0000      |         |
| ETA_Extap_B      | 0.0396  | -0.1944          | 0.0187     | 1.0000      |         |
| bcutp13          | 0.4328  | 0.3499           | 0.7188     | 0.3063      | 1.0000  |

Table S4: Modelling results for all QSARINS models with Var. 1 to 6 along with their statistical validations.

QI View and select models

| St. | No. | ID  | Size | Variables                      | R2     | R2adj  | R2R2adj | Q2     | Kkx    | Delta K | RMSE tr | MAE tr | RSS tr | ICCC tr | ls      | Q2boot | R2-Q2boot | RMSE cv | MAE cv | PRESS cv | CCC cv | Q2 LMO | R2 Yscr | RMSE AV Yscr | Q2 Yscr | ln. ext. OK | RMSE ext | MAE ext | PRESS ext | R2 ext |
|-----|-----|-----|------|--------------------------------|--------|--------|---------|--------|--------|---------|---------|--------|--------|---------|---------|--------|-----------|---------|--------|----------|--------|--------|---------|--------------|---------|-------------|----------|---------|-----------|--------|
| U   | 1   | 198 | 4    | SpMax2_TheMAXDP2               | 0.8949 | 0.8134 | 0.1909  | 0.3471 | 0.0728 | 0.3277  | 2.599   | 1.1553 | 0.5220 | 0.3546  | 67.7200 | 0.8729 | 0.0355    | 0.3859  | 0.3065 | 7.1494   | 0.9338 | 0.8634 | 0.1289  | 1.0095       | -0.2023 | 3           | 0.4908   | 0.3937  | 4.8169    | 0.74   |
| U   | 2   | 197 | 6    | AATSC8_SpMax2_TheMAXDP2        | 0.8945 | 0.8135 | 0.1918  | 0.4028 | 0.0725 | 0.3284  | 2.469   | 1.1773 | 0.5518 | 0.3554  | 67.4010 | 0.8724 | 0.0355    | 0.3866  | 0.2905 | 7.1246   | 0.9337 | 0.8634 | 0.1289  | 1.0095       | -0.2023 | 3           | 0.5050   | 0.4005  | 5.0997    |        |
| U   | 3   | 195 | 6    | SpMax2_TheMAXDP2               | 0.8940 | 0.8135 | 0.1927  | 0.4310 | 0.0401 | 0.3292  | 2.432   | 1.2025 | 0.5515 | 0.3562  | 67.0440 | 0.8723 | 0.0352    | 0.3868  | 0.2854 | 7.1809   | 0.9335 | 0.8634 | 0.1289  | 1.0095       | -0.2023 | 3           | 0.4694   | 0.3636  | 4.4072    |        |
| U   | 4   | 199 | 6    | AATSC8_SpMax2_TheMAXDP2        | 0.8937 | 0.8136 | 0.1931  | 0.4340 | 0.0685 | 0.3296  | 2.444   | 1.2135 | 0.5514 | 0.3566  | 66.8880 | 0.8735 | 0.0338    | 0.3851  | 0.2855 | 7.1170   | 0.9339 | 0.8634 | 0.1289  | 1.0095       | -0.2023 | 3           | 0.5408   | 0.4405  | 5.8487    |        |
| U   | 5   | 196 | 6    | AATSC8_SpMax2_TheMAXDP2        | 0.8930 | 0.8137 | 0.1945  | 0.3773 | 0.0509 | 0.3308  | 2.621   | 1.2516 | 0.5510 | 0.3579  | 66.3520 | 0.8724 | 0.0342    | 0.3867  | 0.3067 | 7.1768   | 0.9334 | 0.8634 | 0.1289  | 1.0095       | -0.2023 | 3           | 0.5018   | 0.3887  | 5.0369    |        |
| U   | 6   | 193 | 6    | AATSC8_MATS2s_SpMax2_TheMAXDP2 | 0.8929 | 0.8137 | 0.1947  | 0.4586 | 0.0639 | 0.3309  | 2.474   | 1.2568 | 0.5510 | 0.3581  | 66.2800 | 0.8710 | 0.0356    | 0.3889  | 0.2903 | 7.2581   | 0.9328 | 0.8634 | 0.1289  | 1.0095       | -0.2023 | 3           | 0.5656   | 0.4742  | 6.3990    |        |
| U   | 7   | 194 | 6    | LODMIN_SpMax2_TheMAXDP2        | 0.8922 | 0.8138 | 0.1959  | 0.3908 | 0.0552 | 0.3320  | 2.598   | 1.2899 | 0.5507 | 0.3592  | 65.8220 | 0.8711 | 0.0348    | 0.3886  | 0.3043 | 7.2492   | 0.9327 | 0.8634 | 0.1289  | 1.0095       | -0.2023 | 3           | 0.5122   | 0.3950  | 5.2471    |        |
| U   | 8   | 192 | 6    | AATSC8_SpMax2_TheMAXDP2        | 0.8921 | 0.8138 | 0.1961  | 0.4800 | 0.0580 | 0.3321  | 2.482   | 1.2949 | 0.5506 | 0.3594  | 65.7540 | 0.8708 | 0.0351    | 0.3891  | 0.2907 | 7.2882   | 0.9324 | 0.8634 | 0.1289  | 1.0095       | -0.2023 | 3           | 0.5477   | 0.4191  | 5.9997    |        |
| U   | 9   | 191 | 6    | LODMIN_SpMax2_TheMAXDP2        | 0.8918 | 0.8141 | 0.2003  | 0.3947 | 0.0711 | 0.3357  | 2.492   | 1.4084 | 0.9495 | 0.3632  | 64.2310 | 0.8703 | 0.0335    | 0.3899  | 0.2924 | 7.2952   | 0.9321 | 0.8634 | 0.1289  | 1.0095       | -0.2023 | 3           | 0.5018   | 0.4000  | 5.0356    |        |
| U   | 10  | 190 | 5    | SpMax2_TheMAXDP2               | 0.8888 | 0.8118 | 0.1858  | 0.3066 | 0.1468 | 0.3412  | 2.780   | 1.5896 | 0.9477 | 0.3648  | 76.1250 | 0.8661 | 0.0345    | 0.3961  | 0.3219 | 7.5293   | 0.9294 | 0.8634 | 0.1289  | 1.0095       | -0.2023 | 3           | 1.0218   | 0.5124  | 20.8795   |        |
| U   | 11  | 189 | 5    | SpMax2_TheMAXDP2               | 0.8882 | 0.8119 | 0.1868  | 0.4438 | 0.0728 | 0.3422  | 2.737   | 1.6209 | 0.9474 | 0.3658  | 75.6540 | 0.8650 | 0.0351    | 0.3977  | 0.3160 | 7.5925   | 0.9290 | 0.8634 | 0.1289  | 1.0095       | -0.2023 | 3           | 0.4669   | 0.3726  | 4.3597    |        |
| U   | 12  | 187 | 5    | SpMax2_TheMAXDP2               | 0.8880 | 0.8121 | 0.1904  | 0.4433 | 0.0793 | 0.3455  | 2.666   | 1.7283 | 0.9463 | 0.3693  | 74.0790 | 0.8634 | 0.0348    | 0.4001  | 0.3076 | 7.6829   | 0.9285 | 0.8634 | 0.1289  | 1.0095       | -0.2023 | 3           | 0.4920   | 0.4119  | 4.8411    |        |
| U   | 13  | 188 | 5    | SpMax2_TheMAXDP2               | 0.8871 | 0.8122 | 0.1923  | 0.3750 | 0.0799 | 0.3472  | 2.691   | 1.7859 | 0.9458 | 0.3712  | 73.2570 | 0.8635 | 0.0336    | 0.3999  | 0.3092 | 7.6781   | 0.9283 | 0.8634 | 0.1289  | 1.0095       | -0.2023 | 3           | 0.5013   | 0.4089  | 5.0260    |        |
| U   | 14  | 186 | 5    | MATS2s_SpMax2_TheMAXDP2        | 0.8842 | 0.8123 | 0.1934  | 0.4068 | 0.0508 | 0.3482  | 2.744   | 1.8189 | 0.9455 | 0.3722  | 72.7950 | 0.8632 | 0.0333    | 0.4004  | 0.3143 | 7.6935   | 0.9282 | 0.8634 | 0.1289  | 1.0095       | -0.2023 | 3           | 0.5709   | 0.4599  | 6.5189    |        |
| U   | 15  | 183 | 5    | SpMax2_TheMAXDP2               | 0.8841 | 0.8123 | 0.1936  | 0.4822 | 0.0750 | 0.3483  | 2.673   | 1.8234 | 0.9454 | 0.3724  | 72.7210 | 0.8623 | 0.0342    | 0.4017  | 0.3085 | 7.7449   | 0.9277 | 0.8634 | 0.1289  | 1.0095       | -0.2023 | 3           | 0.4919   | 0.4157  | 4.8393    |        |
| U   | 16  | 185 | 5    | GATS3_SpMax2_TheMAXDP2         | 0.8840 | 0.8123 | 0.1938  | 0.4429 | 0.0355 | 0.3486  | 2.709   | 1.8316 | 0.9453 | 0.3728  | 72.6160 | 0.8621 | 0.0332    | 0.4025  | 0.3098 | 7.6992   | 0.9280 | 0.8634 | 0.1289  | 1.0095       | -0.2023 | 3           | 0.5273   | 0.4439  | 5.3608    |        |
| U   | 17  | 184 | 5    | SpMax2_TheMAXDP2               | 0.8827 | 0.8125 | 0.1959  | 0.4235 | 0.0835 | 0.3504  | 2.714   | 1.8933 | 0.9447 | 0.3746  | 71.7700 | 0.8623 | 0.0339    | 0.4017  | 0.3121 | 7.7443   | 0.9276 | 0.8634 | 0.1289  | 1.0095       | -0.2023 | 3           | 0.5101   | 0.4141  | 5.2041    |        |
| U   | 18  | 181 | 5    | SpMax2_TheMAXDP2               | 0.8825 | 0.8125 | 0.1963  | 0.4770 | 0.0659 | 0.3507  | 2.681   | 1.9041 | 0.9446 | 0.3749  | 71.6260 | 0.8622 | 0.0338    | 0.4018  | 0.3078 | 7.7508   | 0.9275 | 0.8634 | 0.1289  | 1.0095       | -0.2023 | 3           | 0.4962   | 0.3981  | 4.9250    |        |
| U   | 19  | 182 | 5    | SpMax2_TheMAXDP2               | 0.8825 | 0.8125 | 0.1963  | 0.4638 | 0.0792 | 0.3508  | 2.711   | 1.9053 | 0.9446 | 0.3749  | 71.6060 | 0.8622 | 0.0338    | 0.4018  | 0.3114 | 7.7473   | 0.9274 | 0.8634 | 0.1289  | 1.0095       | -0.2023 | 3           | 0.4949   | 0.3981  | 4.8982    |        |
| U   | 20  | 180 | 4    | SpMax2_TheMAXDP2               | 0.8833 | 0.8125 | 0.1968  | 0.3841 | 0.1239 | 0.3697  | 2.709   | 1.9615 | 0.9381 | 0.3906  | 81.4000 | 0.8622 | 0.0312    | 0.4162  | 0.3051 | 8.1353   | 0.9215 | 0.8634 | 0.1289  | 1.0095       | -0.2023 | 3           | 0.4928   | 0.3954  | 4.8562    | 0.66   |
| U   | 21  | 179 | 4    | SpMax2_TheMAXDP2               | 0.8833 | 0.8125 | 0.1968  | 0.4496 | 0.0920 | 0.3786  | 2.836   | 2.0797 | 0.9349 | 0.4000  | 77.1370 | 0.8479 | 0.0298    | 0.4222  | 0.3187 | 8.5570   | 0.9191 | 0.8291 | 0.0851  | 1.0349       | -0.1422 | 1           | 0.5320   | 0.4109  | 5.6599    | 0.65   |
| U   | 22  | 178 | 4    | MATS1s_SpMax2_TheMAXDP2        | 0.8862 | 0.8114 | 0.2066  | 0.4129 | 0.0416 | 0.3788  | 2.997   | 2.0860 | 0.9348 | 0.4002  | 77.0570 | 0.8469 | 0.0306    | 0.4235  | 0.3354 | 8.6090   | 0.9186 | 0.8230 | 0.0851  | 1.0349       | -0.1454 | 2           | 0.4604   | 0.3554  | 4.6565    | 0.68   |
| U   | 23  | 177 | 4    | SpMax2_TheMAXDP2               | 0.8854 | 0.8115 | 0.2078  | 0.5693 | 0.0282 | 0.3798  | 2.945   | 2.1252 | 0.9344 | 0.4011  | 76.5610 | 0.8453 | 0.0316    | 0.4258  | 0.3295 | 8.7030   | 0.9180 | 0.8225 | 0.0843  | 1.0354       | -0.1451 | 0           | 0.5321   | 0.4203  | 5.6337    | 0.22   |
| U   | 24  | 172 | 4    | GATS1s_SpMax2_TheMAXDP2        | 0.8850 | 0.8115 | 0.2084  | 0.4305 | 0.0967 | 0.3805  | 3.008   | 2.1479 | 0.9342 | 0.4020  | 76.2710 | 0.8453 | 0.0312    | 0.4258  | 0.3269 | 8.7013   | 0.9176 | 0.8192 | 0.0845  | 1.0352       | -0.1422 | 1           | 0.5346   | 0.4304  | 5.7170    | 0.66   |
| U   | 25  | 175 | 4    | SpMax2_TheMAXDP2               | 0.8818 | 0.8118 | 0.2133  | 0.3338 | 0.1073 | 0.3849  | 2.920   | 2.1100 | 0.9325 | 0.4066  | 74.2910 | 0.8393 | 0.0343    | 0.4339  | 0.3286 | 9.0379   | 0.9141 | 0.8221 | 0.0870  | 1.0338       | -0.1396 | 1           | 0.4569   | 0.3268  | 4.1746    | 0.62   |
| U   | 26  | 176 | 4    | SpMax2_TheMAXDP2               | 0.8817 | 0.8118 | 0.2135  | 0.4085 | 0.1247 | 0.3851  | 3.069   | 2.1183 | 0.9324 | 0.4069  | 74.1920 | 0.8416 | 0.0319    | 0.4308  | 0.3435 | 9.1020   | 0.9155 | 0.8223 | 0.0836  | 1.0358       | -0.1442 | 2           | 0.5040   | 0.4069  | 5.0798    | 0.70   |
| U   | 27  | 174 | 4    | SpMax2_TheMAXDP2               | 0.8815 | 0.8118 | 0.2139  | 0.3808 | 0.0865 | 0.3854  | 3.063   | 2.1284 | 0.9323 | 0.4072  | 74.0590 | 0.8390 | 0.0342    | 0.4343  | 0.3447 | 9.0554   | 0.9141 | 0.8191 | 0.0853  | 1.0348       | -0.1421 | 3           | 0.4532   | 0.3531  | 4.1087    | 0.72   |
| U   | 28  | 171 | 4    | MATS3s_SpMax2_TheMAXDP2        | 0.8828 | 0.8119 | 0.2152  | 0.3921 | 0.0555 | 0.3866  | 2.848   | 2.1736 | 0.9319 | 0.4084  | 73.5360 | 0.8406 | 0.0318    | 0.4321  | 0.3196 | 8.9630   | 0.9149 | 0.8340 | 0.0851  | 1.0349       | -0.1427 | 1           | 0.5669   | 0.4487  | 6.4283    | 0.63   |
| U   | 29  | 173 | 4    | SpMax2_TheMAXDP2               | 0.8890 | 0.8120 | 0.2177  | 0.4155 | 0.1154 | 0.3899  | 3.226   | 2.2579 | 0.9310 | 0.4108  | 72.5570 | 0.8388 | 0.0322    | 0.4346  | 0.3622 | 9.0670   | 0.9139 | 0.8175 | 0.0862  | 1.0342       | -0.1403 | 1           | 0.5229   | 0.3875  | 5.4689    | 0.60   |
| U   | 30  | 182 | 3    | SpMax2_TheMAXDP2               | 0.8846 | 0.8142 | 0.2078  | 0.2866 | 0.1761 | 0.4255  | 3.322   | 2.7217 | 0.9158 | 0.4457  | 79.7980 | 0.8165 | 0.0283    | 0.4638  | 0.3629 | 10.3234  | 0.9005 | 0.8091 | 0.0635  | 1.0472       | -0.1167 | 1           | 0.5751   | 0.4284  | 6.4154    | 0.61   |
| U   | 31  | 161 | 3    | SpMax2_TheMAXDP2               | 0.8307 | 0.8108 | 0.2426  | 0.2684 | 0.1445 | 0.4310  | 3.455   | 3.9166 | 0.9139 | 0.4502  | 77.8500 | 0.8109 | 0.0306    | 0.4708  | 0.3782 | 10.6374  | 0.8981 | 0.8035 | 0.0602  | 1.0491       | -0.1222 | 1           | 0.5576   | 0.4361  | 6.2178    | 0.64   |
| U   | 32  | 159 | 3    | SpMax2_TheMAXDP2               | 0.8204 | 0.8115 | 0.2573  | 0.2653 | 0.0436 | 0.4439  | 3.949   | 4.5470 | 0.9082 | 0.4636  | 7       |        |           |         |        |          |        |        |         |              |         |             |          |         |           |        |
